# Supplementary material for: Decoupled hydrogen evolution from water/seawater splitting by integrating ethylene glycol oxidation on PtRh0.02@Rh nanowires with Rh atom modification
Source: Royal Society of Chemistry journal article supplement (doi:10.1039/d2ta05469h), 2022-01-01
Supplement: d2ta05469h1.pdf [file d2ta05469h1.pdf]

## Electronic Supplementary Information

### Decoupled Hydrogen Evolution from Water/Seawater Splitting by Integrating Ethylene Glycol Oxidation on PtRh<sub>0.02</sub>@Rh Nanowires with Rh Atoms Modifying

Xue Jiang,<sup>ab</sup> Zemeng Dong,<sup>ab</sup> Qiong Zhang,<sup>ab</sup> Guang-Rui Xu,<sup>\*a</sup> Jianping Lai,<sup>ab</sup>  
Zhenjiang Li,<sup>a</sup> and Lei Wang<sup>\*abc</sup>

*a. Key Laboratory of Eco-chemical Engineering, Key Laboratory of Optic-electric Sensing and Analytical Chemistry of Life Science, Taishan Scholar Advantage and Characteristic Discipline Team of Eco Chemical Process and Technology, School of Materials Science and Engineering, Qingdao University of Science and Technology, Qingdao 266042, PR China.*

*b. College of Chemistry and Molecular Engineering, Qingdao University of Science and Technology, Qingdao 266042, PR China.*

*c. College of Environment and Safety Engineering, Qingdao University of Science and Technology, Qingdao, 266042, PR China*

\* Corresponding authors.

E-mail address: irnorchemwl@126.com (L. Wang); xugrui@gmail.com (G.-R. Xu);

## Figure

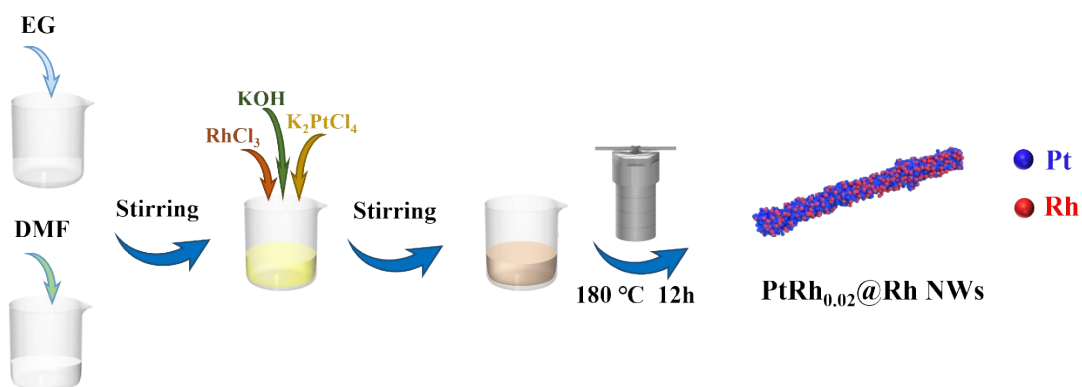

**Fig. S1.** The synthesis process of PtRh<sub>0.02</sub>@Rh NWs.

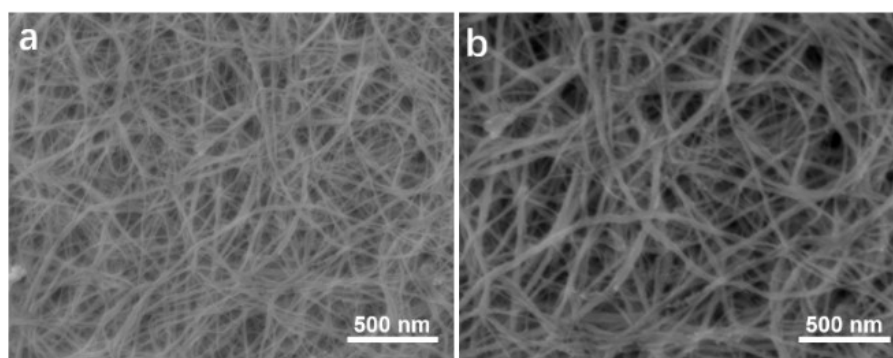

**Fig. S2.** The SEM images of (a) PtRh<sub>0.1</sub>@Rh NWs, (b) PtRh<sub>0.34</sub>@Rh NWs.

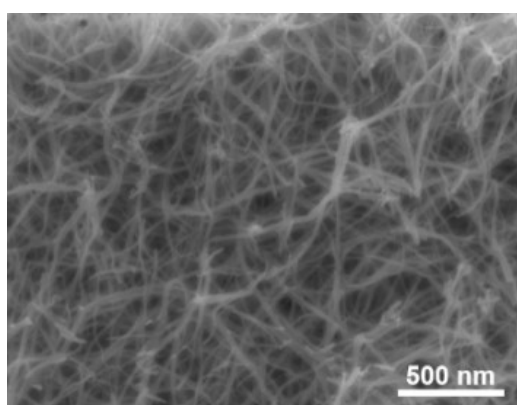

**Fig. S3.** The SEM image of Pt NWs.

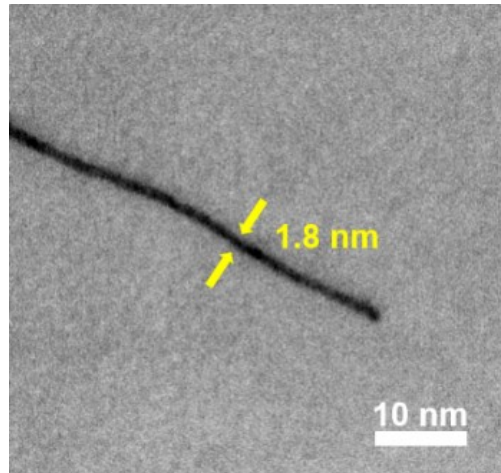

**Fig. S4.** The TEM image of single ultrafine PtRh<sub>0.02</sub>@Rh NWs.

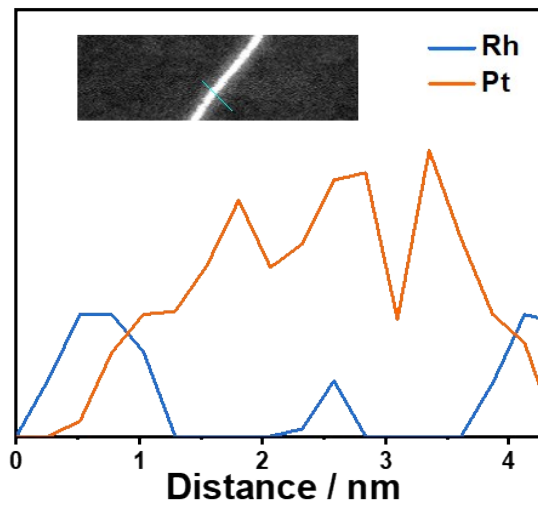

**Fig. S5.** The line scan of single PtRh<sub>0.02</sub>@Rh NWs.

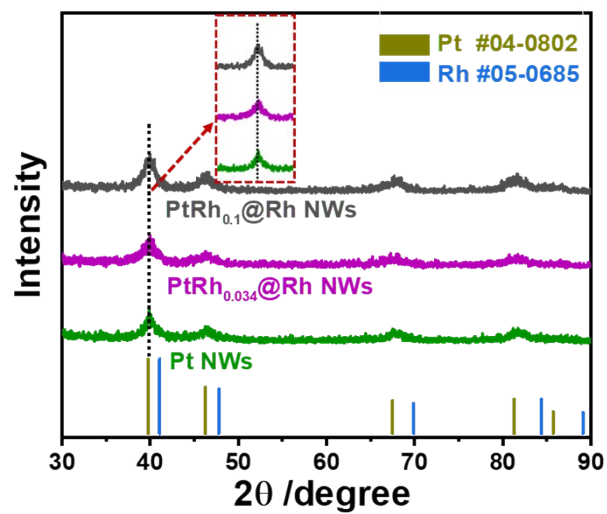

**Fig. S6.** The PXRD pattern of PtRh<sub>0.1</sub>@Rh NWs, PtRh<sub>0.034</sub>@Rh NWs, and Pt NWs.

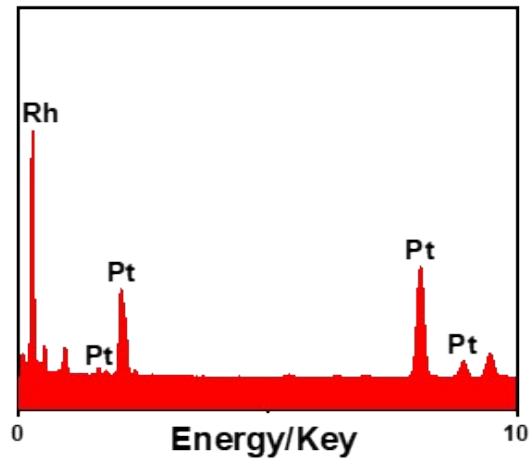

**Fig. S7.** The EDX result of PtRh<sub>0.02</sub>@Rh NWs.

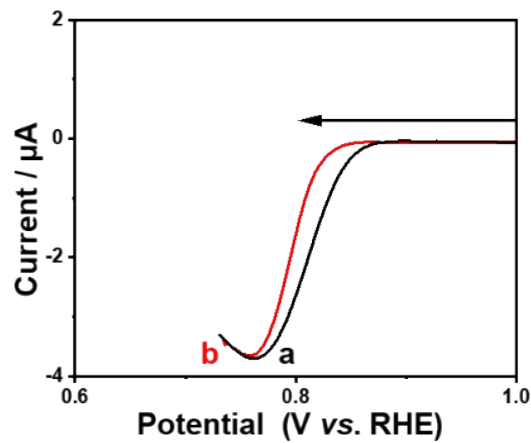

**Fig. S8.** The LSV curves of the reduction potential of (a) Pt<sup>II</sup> precursor to Pt<sup>0</sup> and (b) Rh<sup>III</sup> precursor to Rh<sup>0</sup>.

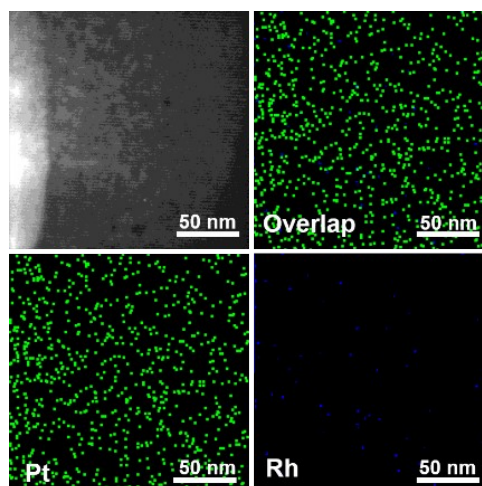

**Fig. S9.** The elemental mappings of Pt nanoparticles at the first formation stage of PtRh<sub>0.02</sub>@Rh NWs.

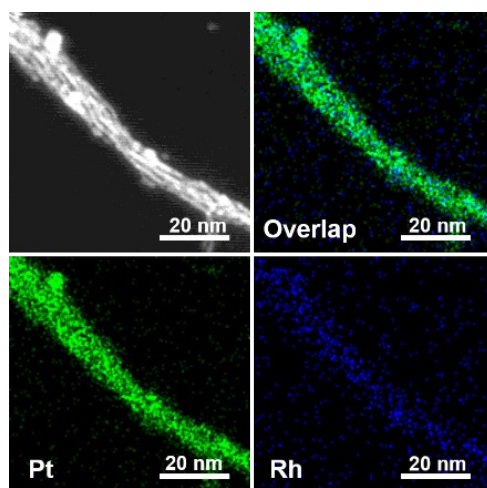

**Fig. S10.** The elemental mappings of PtRh NWs after maintaining 1 h at 180 °C.

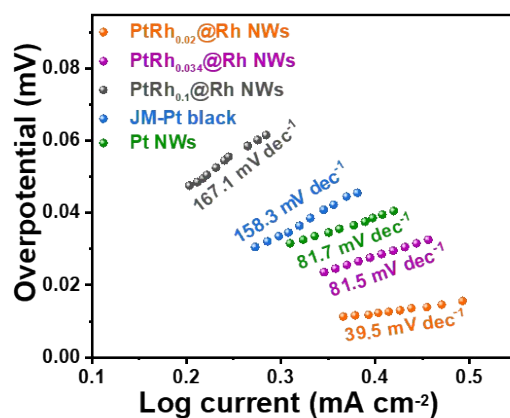

**Fig. S11.** The Tafel plots of PtRh<sub>0.02</sub>@Rh NWs, PtRh<sub>0.034</sub>@Rh NWs, PtRh<sub>0.1</sub>@Rh NWs, Pt NWs, and JM-Pt black in alkaline seawater, respectively.

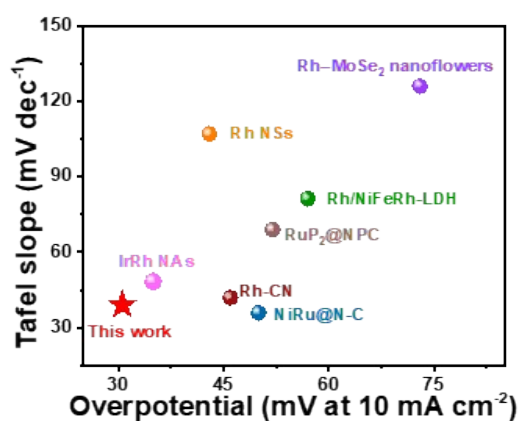

**Fig. S12.** Comparison of overpotential at the current densities of 10 mA cm<sup>-2</sup> and Tafel slopes for the state-of-the-art HER catalysts in alkaline media.

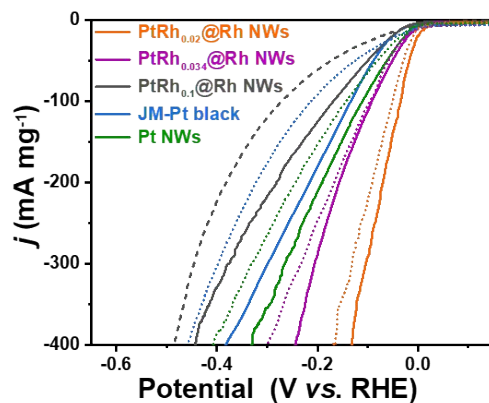

**Fig. S13.** Polarization curves of PtRh<sub>0.02</sub>@Rh NWs, PtRh<sub>0.034</sub>@Rh NWs, PtRh<sub>0.1</sub>@Rh NWs, Pt NWs, and JM-Pt black in alkaline fresh water and alkaline seawater, respectively.

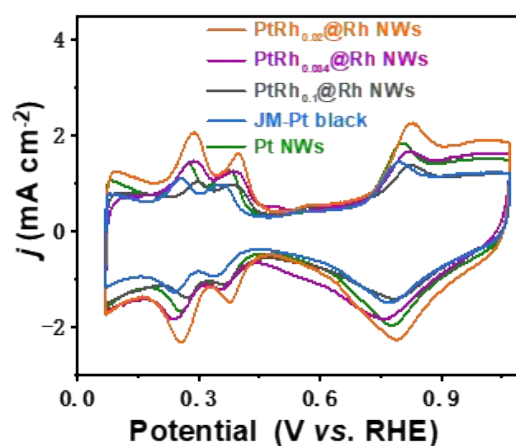

**Fig. S14.** The CV curves of Pt NWs, PtRh<sub>0.02</sub>@Rh NWs, PtRh<sub>0.034</sub>@Rh NWs, PtRh<sub>0.1</sub>@Rh NWs, and JM-Pt black in  $\text{N}_2$ -saturated 0.1 M KOH solution.

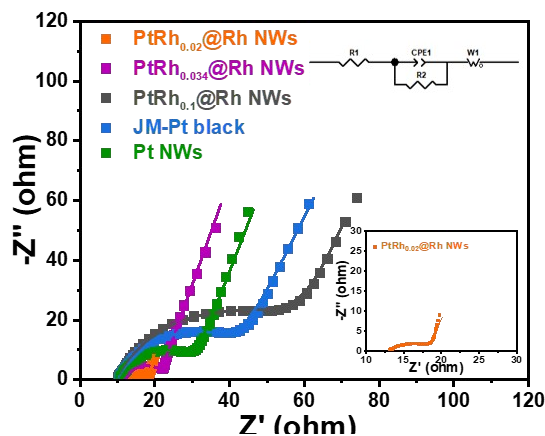

**Fig. S15.** The Nyquist plots of Pt NWs, PtRh<sub>0.02</sub>@Rh NWs, PtRh<sub>0.034</sub>@Rh NWs, PtRh<sub>0.1</sub>@Rh NWs, and JM-Pt black at 50 mV vs. RHE.

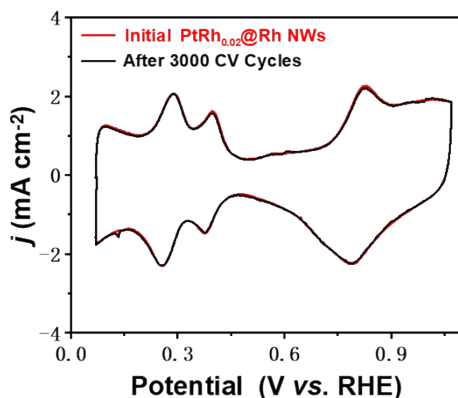

**Fig. S16.** The CV curves of PtRh<sub>0.02</sub>@Rh NWs in N<sub>2</sub>-saturated 0.1 M KOH solution with a scan rate of 50 mV·s<sup>-1</sup>.

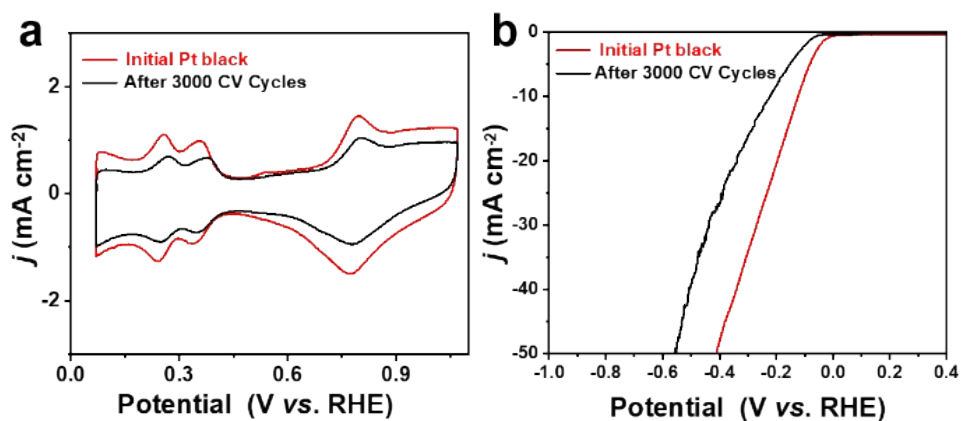

**Fig. S17.** (a) The CV curves of Pt black in N<sub>2</sub>-saturated 0.1 M KOH solution with a scan rate of 50 mV·s<sup>-1</sup>. (b) Polarization curves of Pt black before and after 3000 CV cycles.

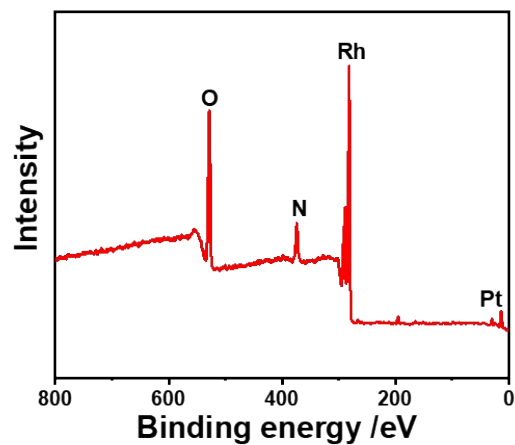

**Fig. S18.** Full XPS spectrum of PtRh<sub>0.02</sub>@Rh NWs after long-time durability in the water.

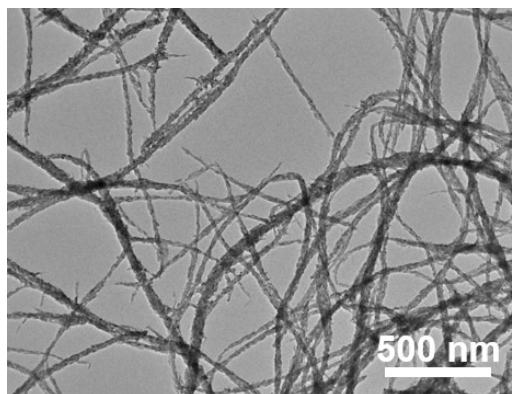

**Fig. S19.** TEM image of PtRh<sub>0.02</sub>@Rh NWs after long-time durability in the water.

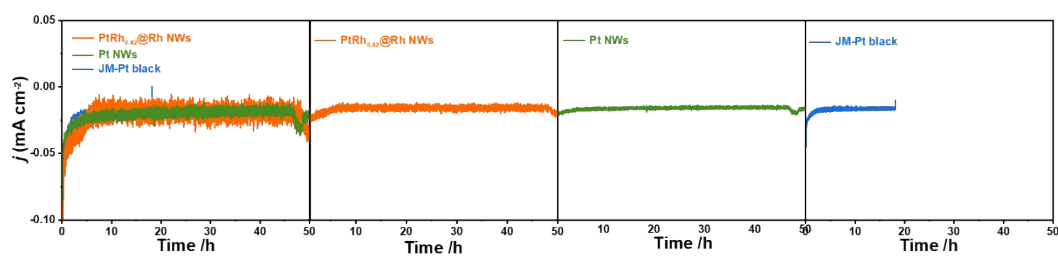

**Fig. S20.** The long-term stability tests of PtRh<sub>0.02</sub>@Rh NW, Pt NW, and JM-Pt black at 10 mA cm<sup>-2</sup> without iR compensation.



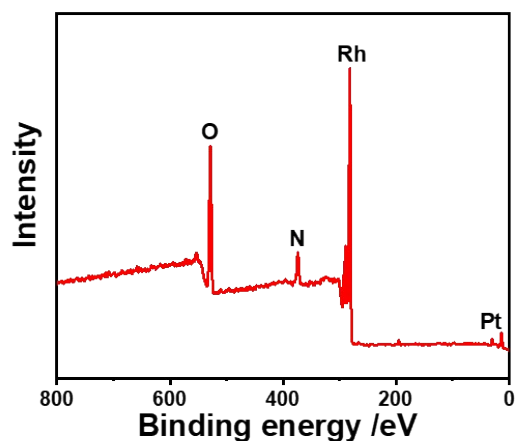

**Fig. S21.** Full XPS spectrum of PtRh<sub>0.02</sub>@Rh NWs after long-time durability in the alkaline seawater.

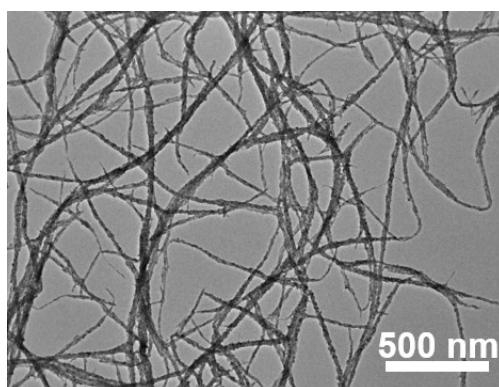

**Fig. S22.** TEM image of PtRh<sub>0.02</sub>@Rh NWs after long-time durability in the alkaline seawater.

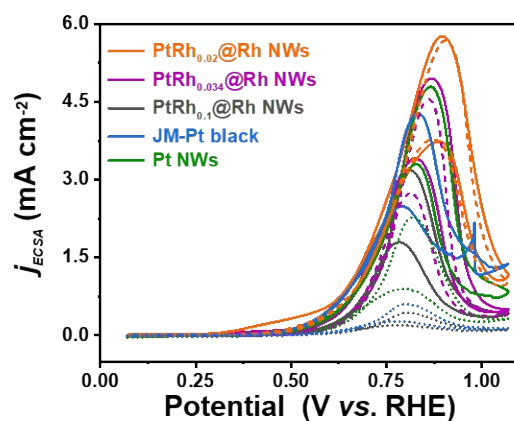

**Fig. S23.** The ECSA-normalized CV curves of PtRh<sub>0.02</sub>@Rh NWs, PtRh<sub>0.034</sub>@Rh NWs, PtRh<sub>0.1</sub>@Rh NWs, Pt NWs, and Pt black in 0.1 M KOH and 0.5 M Ethylene glycol solution.

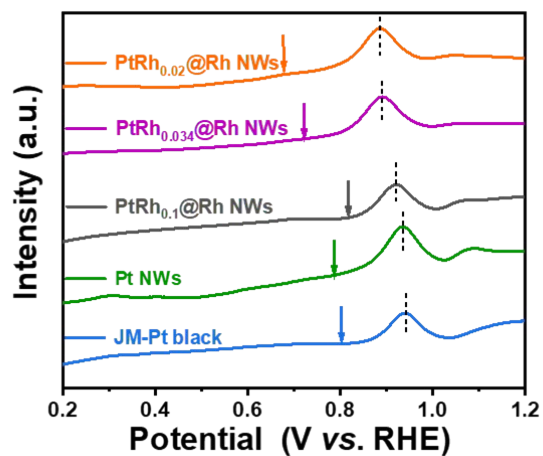

**Fig. S24.** CO stripping curves of PtRh<sub>0.02</sub>@Rh NWs, PtRh<sub>0.034</sub>@Rh NWs, PtRh<sub>0.1</sub>@Rh NWs, Pt NWs, and JM-Pt black.

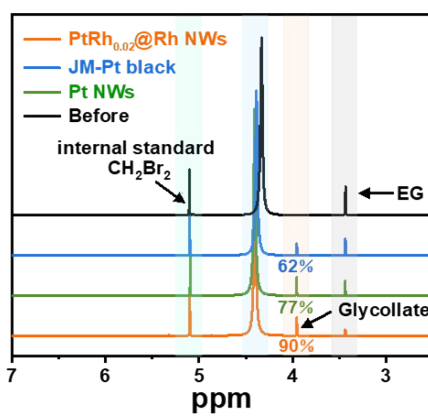

**Fig. S25.** The product was analyzed by <sup>1</sup>H NMR using CH<sub>2</sub>Br<sub>2</sub> (1 mmol) as the internal standard. <sup>1</sup>H NMR (500 MHz, DMSO-d<sub>6</sub>) spectra of compound glycollate.

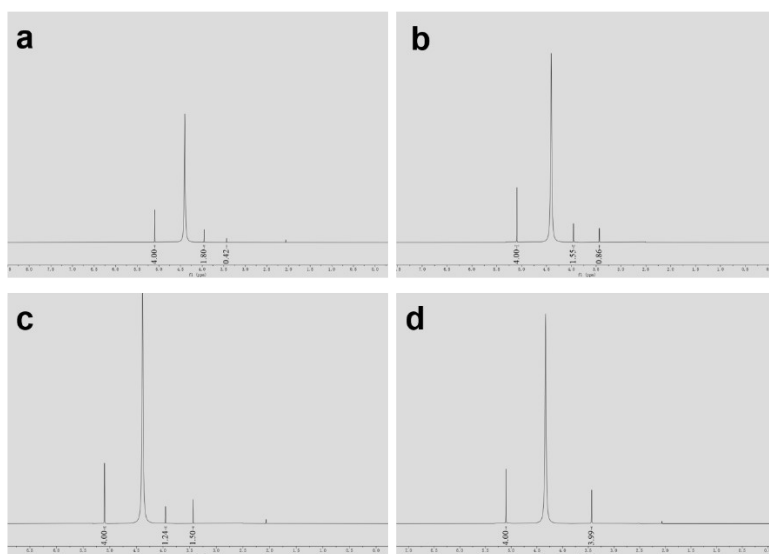

**Fig. S26.** The product was analyzed by  $^1\text{H}$  NMR using  $\text{CH}_2\text{Br}_2$  (1 mmol) as the internal standard.  $^1\text{H}$  NMR (500 MHz,  $\text{DMSO-d}_6$ ) spectra of compound glycolate. (a)  $\text{PtRh}_{0.02}@\text{Rh}$  NWs, (b) Pt NWs, (c) Pt black, and (d) without catalyst.

**Table S1.** The surface atomic ratio of Pt:Rh.

| Component | Atomic conc. [%] | Error [%] | Mass conc. [%] | Error [%] |
|-----------|------------------|-----------|----------------|-----------|
| Rh 3d     | 8.84             | 0.30      | 17.84          | 0.36      |
| Pt 4f     | 16.65            | 0.47      | 63.70          | 0.52      |
